# Supplementary material
Source: PubMed Central journal article supplement (PMC7783734)
Supplement: ajcr0010-4287-f8.pdf [file ajcr0010-4287-f8.pdf]

# Inhibition of pyroptosis protects OSCC noncancerous tissue

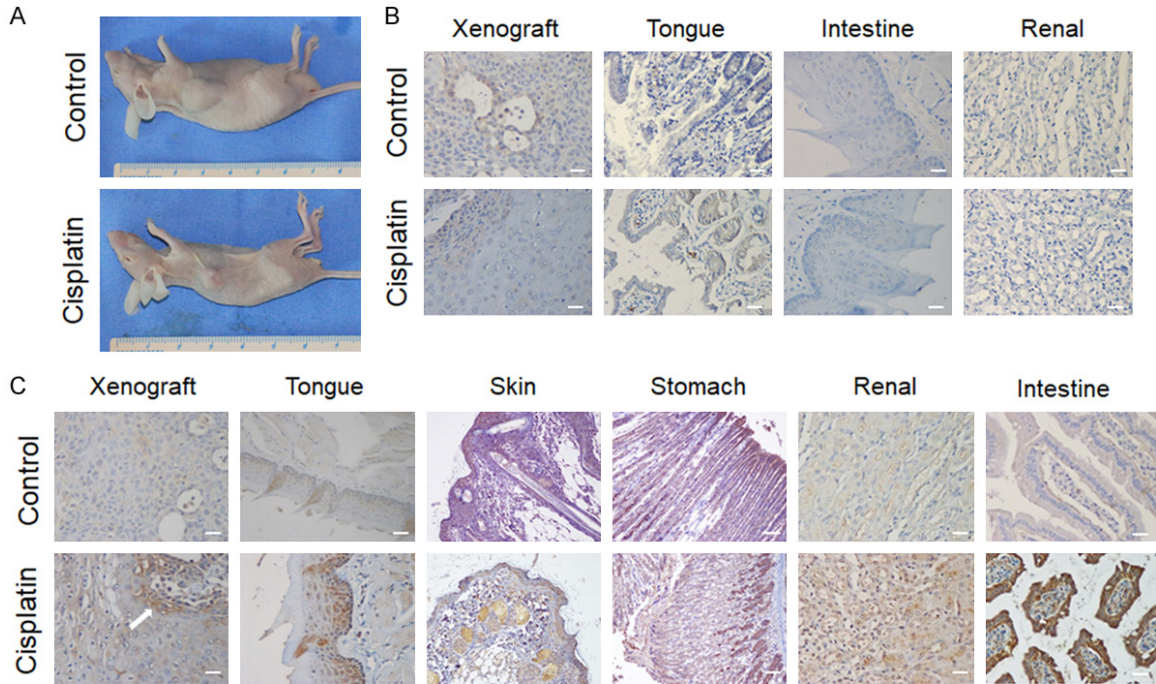

**Figure S1.** A. After chemotherapy, the mice appeared to have a hunched back, thin physique and other adverse reactions; B. Typical immunohistochemical analysis of GSDMD expression in OSCC xenograft mice samples, with tumour, tongue, intestine and renal tissues. GSDMD did not show an increased trend (scale bar size 20  $\mu\text{m}$ ); C. Immunohistochemical analysis of GSDME expression in OSCC xenograft mice samples, with xenograft, tongue, skin, stomach, renal and intestine tissues. After cisplatin treatment, GSDME was high expressed (scale bar size 20  $\mu\text{m}$ ).

## Inhibition of pyroptosis protects OSCC noncancerous tissue

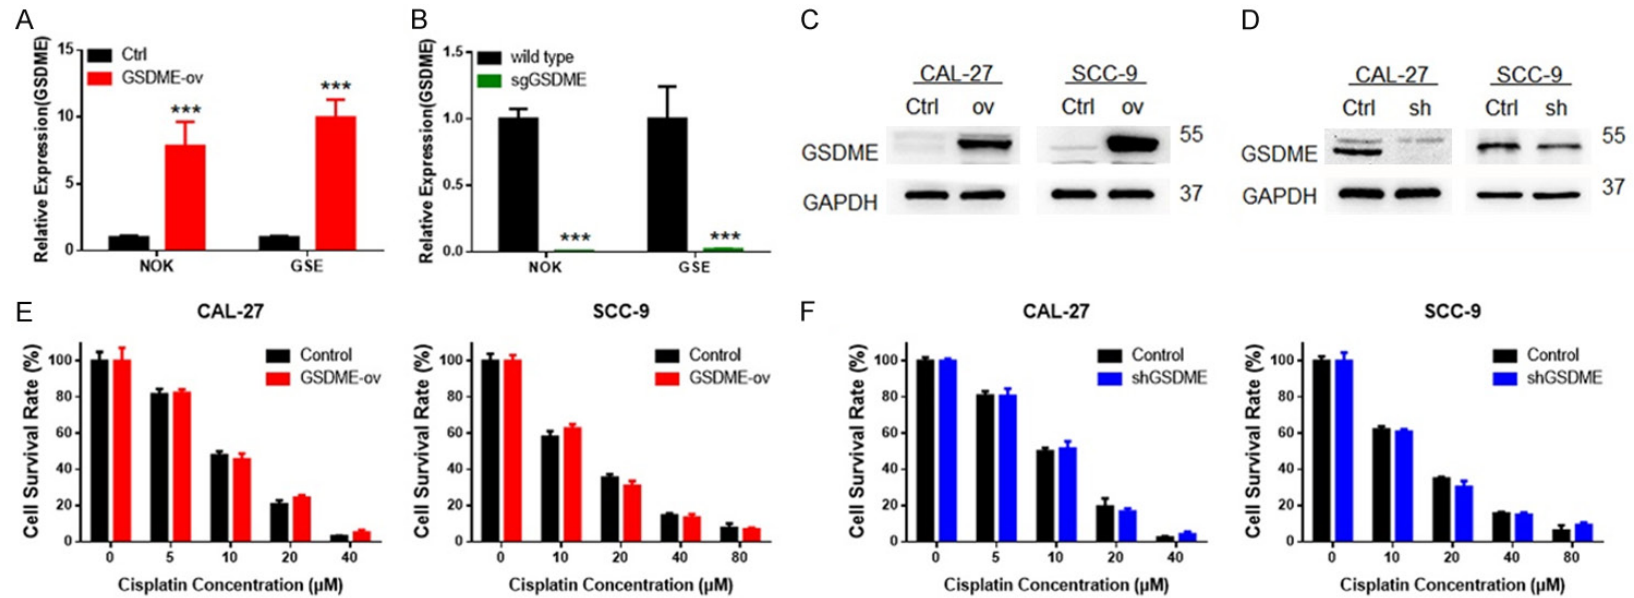

**Figure S2.** GSDME expression does not affect the sensitivity of OSCC cells to cisplatin chemotherapy. A. PCR confirmed that GSDME was overexpressed in NOKs and GSEs; B. PCR confirmed that GSDME was inhibited in NOKs and GSEs; C. Immunoblot confirmed that GSDME was overexpressed in the OSCC cell line (CAL-27 and SCC-9); D. Immunoblot confirmed that GSDME was inhibited in the OSCC cell line (CAL-27 and SCC-9); E. Gradient concentration of cisplatin-treated GSDME overexpressing OSCC cell lines; increased GSDME expression does not affect the cellular cisplatin sensitivity; F. Gradient concentration of the cisplatin-treated OSCC cell line with inhibited GSDME expression; decreased GSDME expression does not affect the cellular cisplatin tolerance.

# Inhibition of pyroptosis protects OSCC noncancerous tissue

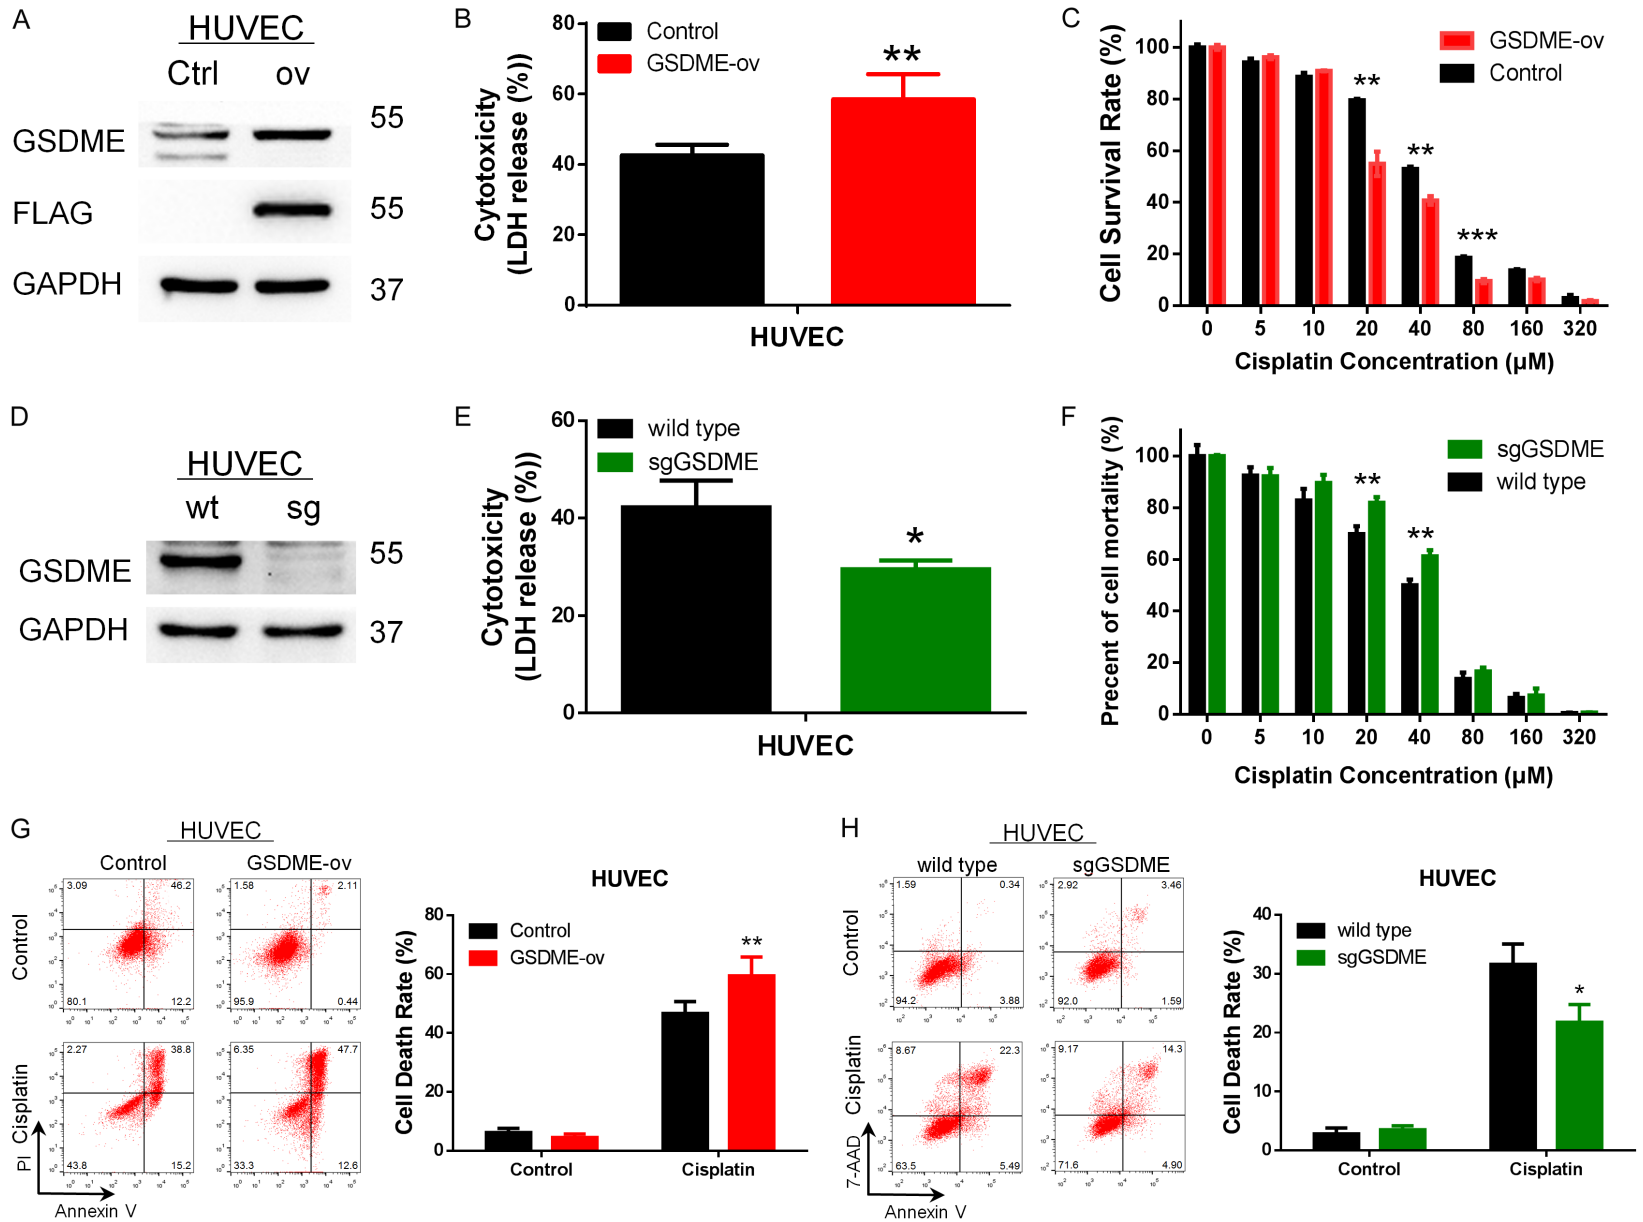

## Inhibition of pyroptosis protects OSCC noncancerous tissue

**Figure S3.** GSDME expression in HUVECs regulates the chemotherapy sensitivity of these cells. A. Immunoblot confirmed that GSDME was overexpressed in HUVECs; the Flag-tag was successfully fused to GSDME; B. The cytotoxicity assay revealed elevated LDH release in GSDME overexpressing HUVECs compared with control cells after cisplatin treatment; C. Gradient concentration of cisplatin-treated GSDME-ov HUVECs and decreased cisplatin tolerance was confirmed; D. Immunoblot analysis confirmed that GSDME was knockout in HUVECs; E. Cytotoxicity assay revealed decreases in LDH release in GSDME-knockout HUVECs compared with control cells after cisplatin treatment; F. Gradient concentration of cisplatin-treated HUVECs with GSDME knockout, and increased cisplatin tolerance; G. FCM detected the cisplatin-sensitive effect on GSDME-ov cell lines using HUVECs; H. FCM detected the cisplatin-tolerant effect on the GSDME-knockout HUVECs; (cisplatin treatment: 40  $\mu$ M, 24 hours for B, E, G, and H).

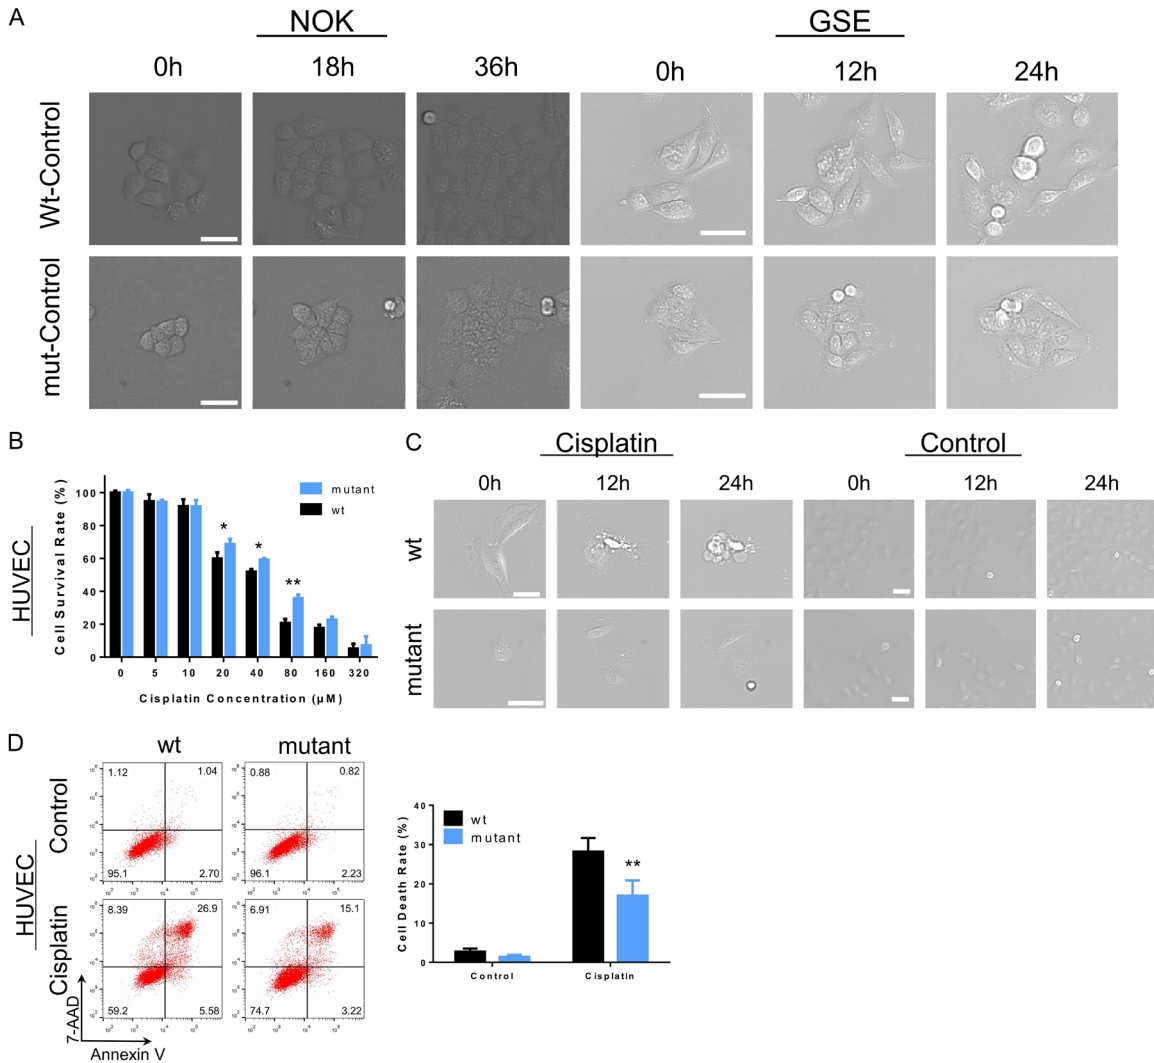

**Figure S4.** A. Microscope image of GSDME-wt and GSDME-mut cell lines of NOKs and GSEs during cisplatin treatments (control group, scale bar: 50  $\mu$ m); B. Gradient concentration of cisplatin-treated GSDME-wt/mut HUVECs; the GSDME-mut cell line was more tolerant than the GSDME-wt ones; C. Microscope capture during the cell death process induced by cisplatin of HUVECs GSDME-wt/mutant cell lines (scale bar: 50  $\mu$ m); D. FCM detected the cisplatin-tolerant effect on the GSDME-wt/mut HUVECs; under same concentration, cisplatin induced more cell death in the GSDME-wt group; (cisplatin treatment: 40  $\mu$ M, 24 hours for B, C, and D).

## Inhibition of pyroptosis protects OSCC noncancerous tissue

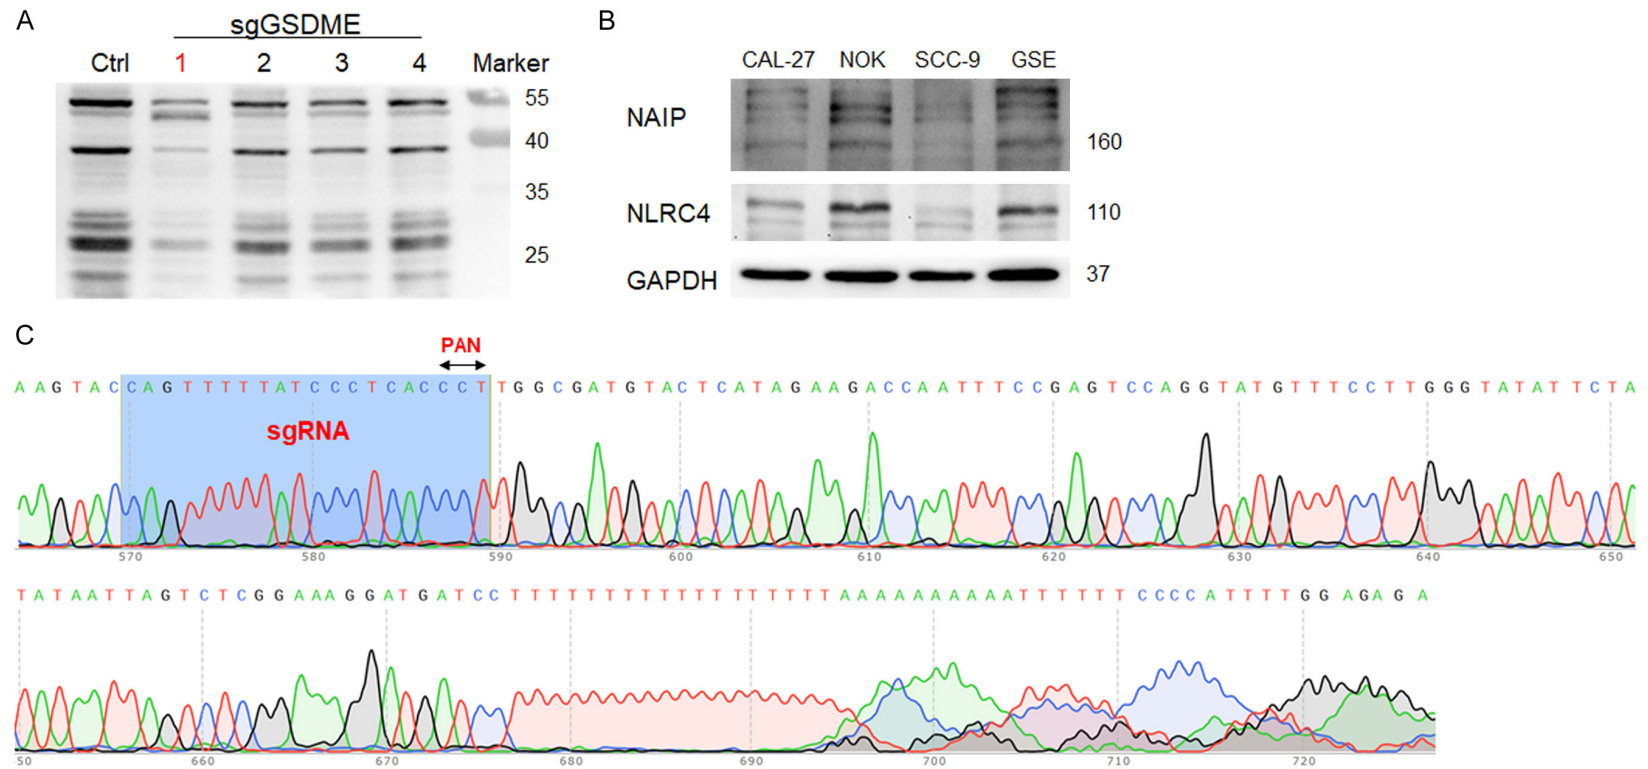

**Figure S5.** Construction and verification of GSDME knockout cell line. A. After transfecting px458-sgGSDME in NOKs, monoclonal immunoblot was used to detect the expression of GSDME, and clone 1 was selected for sequencing verification; B. Immunoblot detection of NAIP-NLRC4 expression in OSCC tumour cells and normal tissue cells and found that the expression of NAIP-NLRC4 in tumour cells was lower than that in normal tissue cells; C. DNA sequencing of sgGSDME cells; it was found that the sgRNA sequence was truncated, confirming the function of sgRNA.

## Inhibition of pyroptosis protects OSCC noncancerous tissue

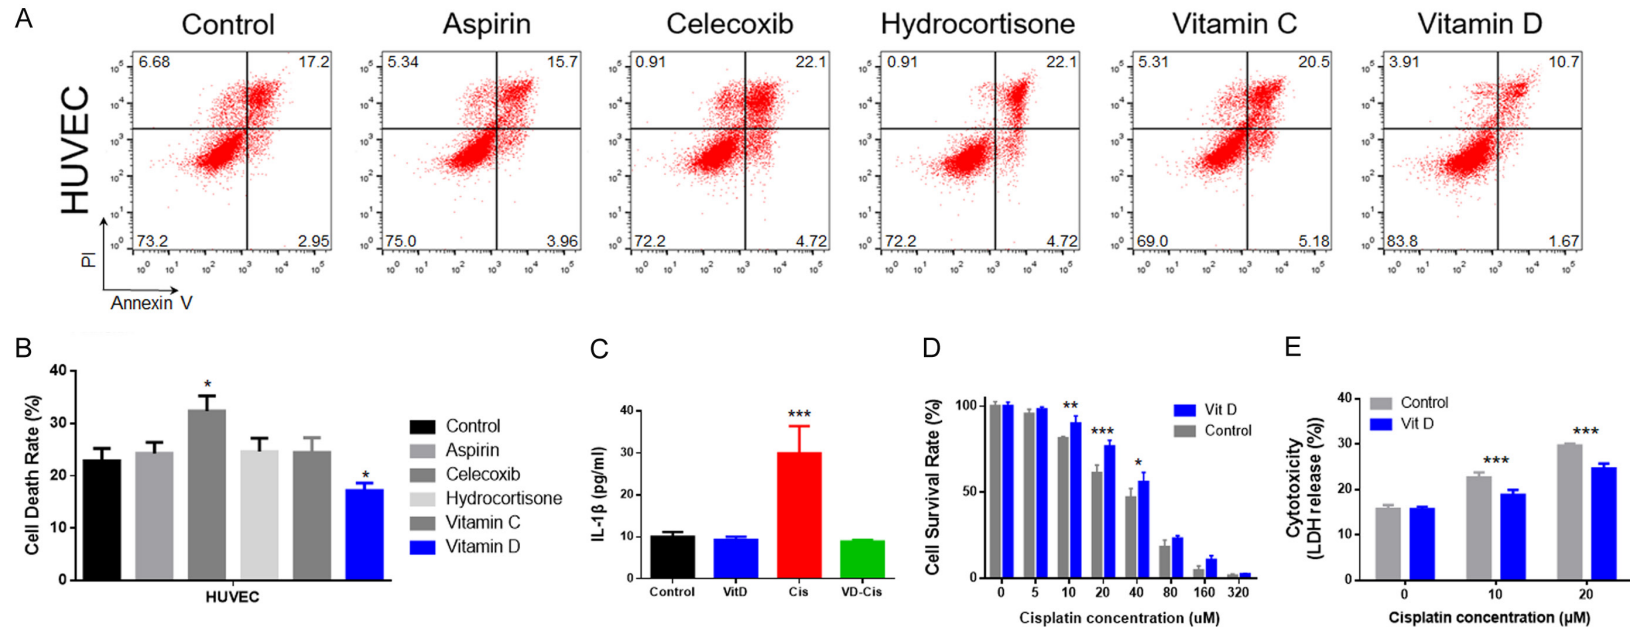

**Figure S6.** (A) FCM revealed cisplatin-induced cell death in HUVECs after pre-treatment with aspirin, celecoxib, hydrocortisone, vitamin C and vitamin D; (B) Statistical analysis of the cell death rates shown in (A); (C) ELISA revealed reduced IL-1 $\beta$  secretion in HUVECs pre-treated with vitamin D; (D) Gradient concentration of cisplatin-treated HUVECs pre-treated with vitamin D, which increased cisplatin tolerance; (E) Cytotoxicity assay revealed that LDH release was reduced in HUVECs pre-treated with vitamin D compared with control cells after cisplatin treatment. (cisplatin treatment: 40  $\mu$ M, 24 hours for B-D).
